# Supplementary material for: Experimental and Theoretical Approaches in the Study of Phenanthroline‐Tetrahydroquinolines for Alzheimer's Disease
Source: PubMed Central journal article supplement — ChemistryOpen. 2019 May 21;8(5):627–36. doi: 10.1002/open.201900073 (PMC6528641; doi:10.1002/open.201900073), 2019-05-21
Supplement: OPEN-8-627-s001.pdf [file OPEN-8-627-s001.pdf]

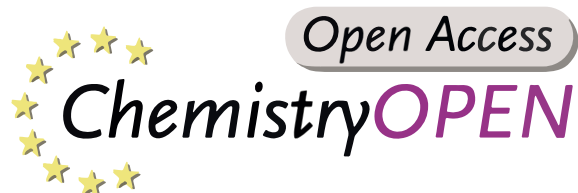

## Supporting Information

© Copyright Wiley-VCH Verlag GmbH & Co. KGaA, 69451 Weinheim, 2019

# Experimental and Theoretical Approaches in the Study of Phenanthroline-Tetrahydroquinolines for Alzheimer's Disease

Yorley Duarte,\* Margarita Gutierrez, Rocío Álvarez, Jans H. Alzate-Morales, and Jorge Soto-Delgado©2019 The Authors. Published by Wiley-VCH Verlag GmbH & Co. KGaA.

This is an open access article under the terms of the Creative Commons Attribution Non-Commercial License, which permits use, distribution and reproduction in any medium, provided the original work is properly cited and is not used for commercial purposes.

# Supporting Information

## Chemistry

FT-IR spectra were recorded in potassium bromide pellets using a Thermo Nicolet NEXUS 670 FT-IR spectrophotometer, with  $0.125\text{ cm}^{-1}$  spectral resolution.  $^1\text{H}$  NMR (200 MHz) and  $^{13}\text{C}$  NMR (101 MHz) spectra were recorded in  $\text{CDCl}_3$  or  $\text{DMSO}-d_6$ , with a Bruker AMX or a Bruker AM-400 spectrometers. High-resolution mass spectrometry ESI-MS and ESI-MS/MS analyses were conducted in a high-resolution hybrid quadrupole (Q) and orthogonal time-of-flight (TOF) mass spectrometer (Waters/Micromass Q-TOF micro, Manchester, UK) with a constant nebulizer temperature of  $100\text{ }^\circ\text{C}$ . The samples were directly infused into the ESI source, via a syringe pump, at flow rates of  $5\text{ }\mu\text{L}/\text{min}$ , via the instrument's injection valve.

## NMR, IR and Mass Spectra for products

### Molecule 4a

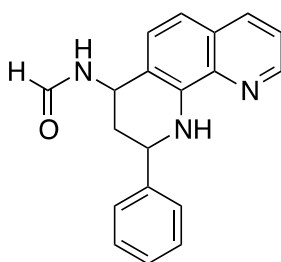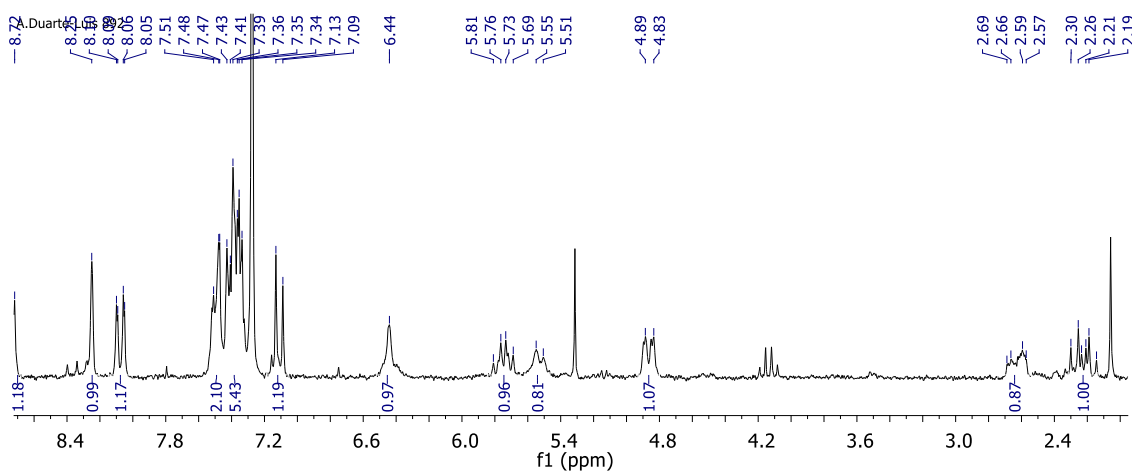

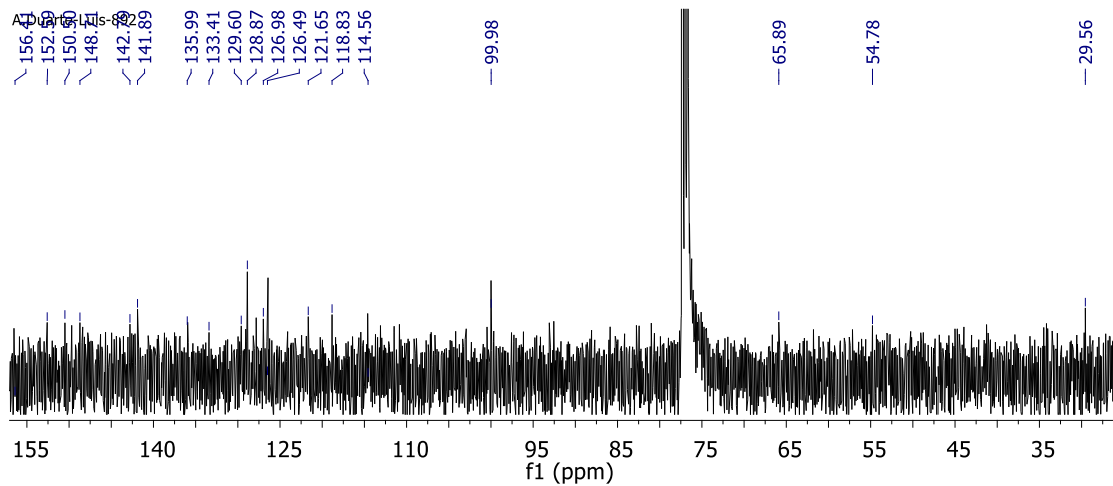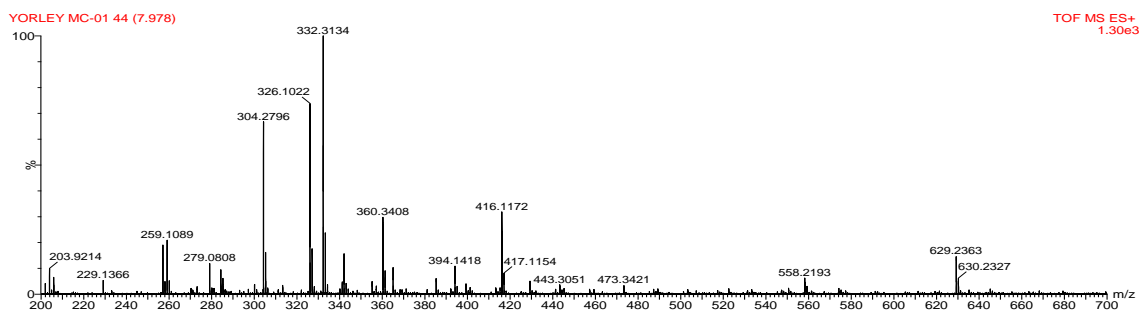

### Molecule 4b

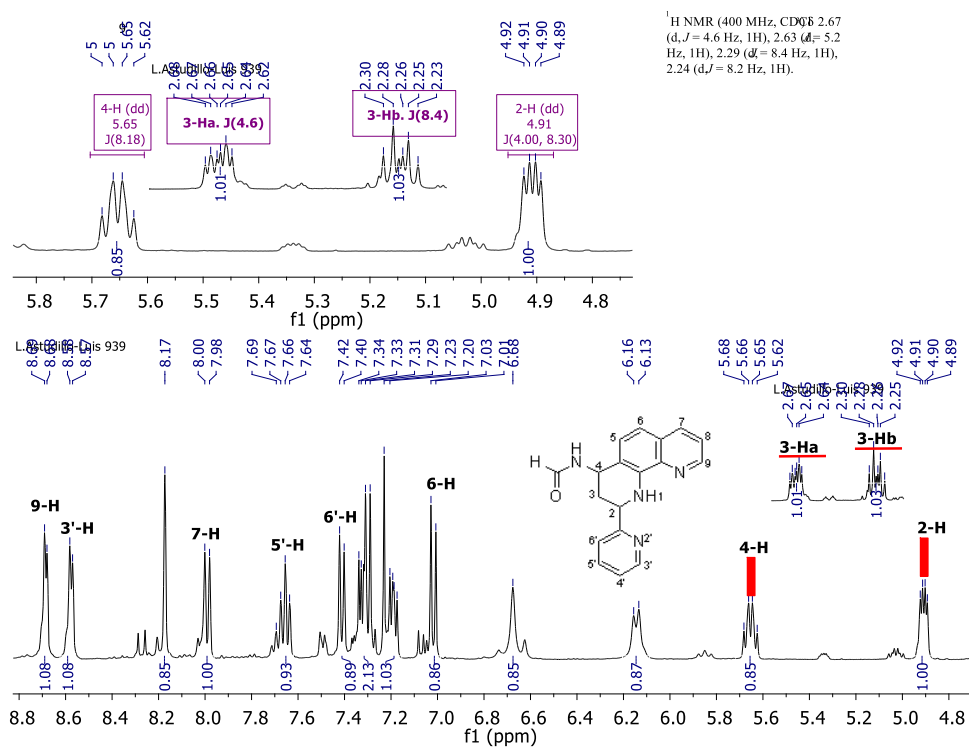

13C

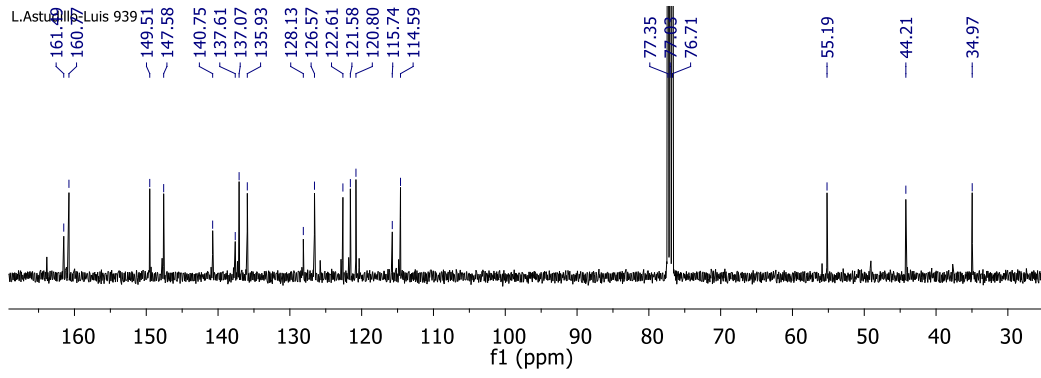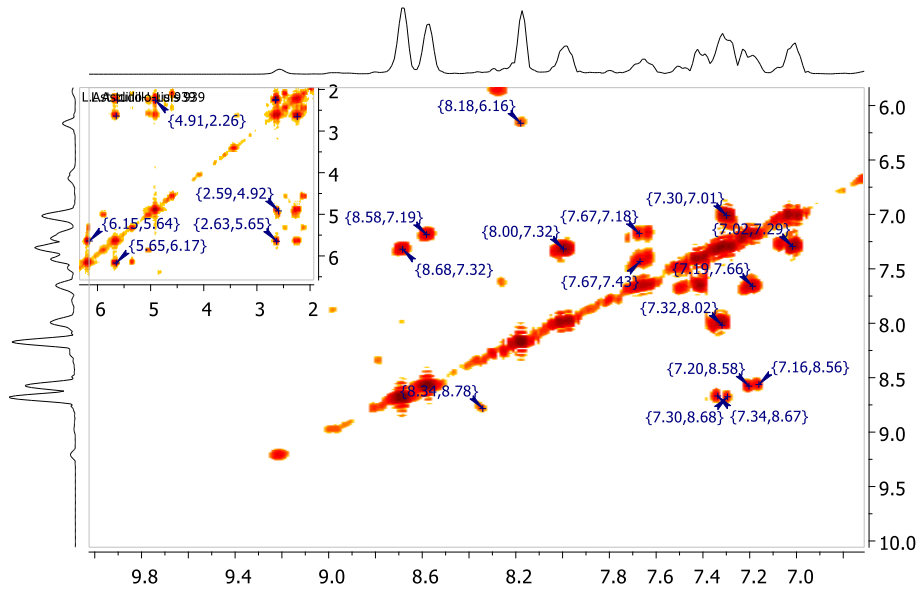

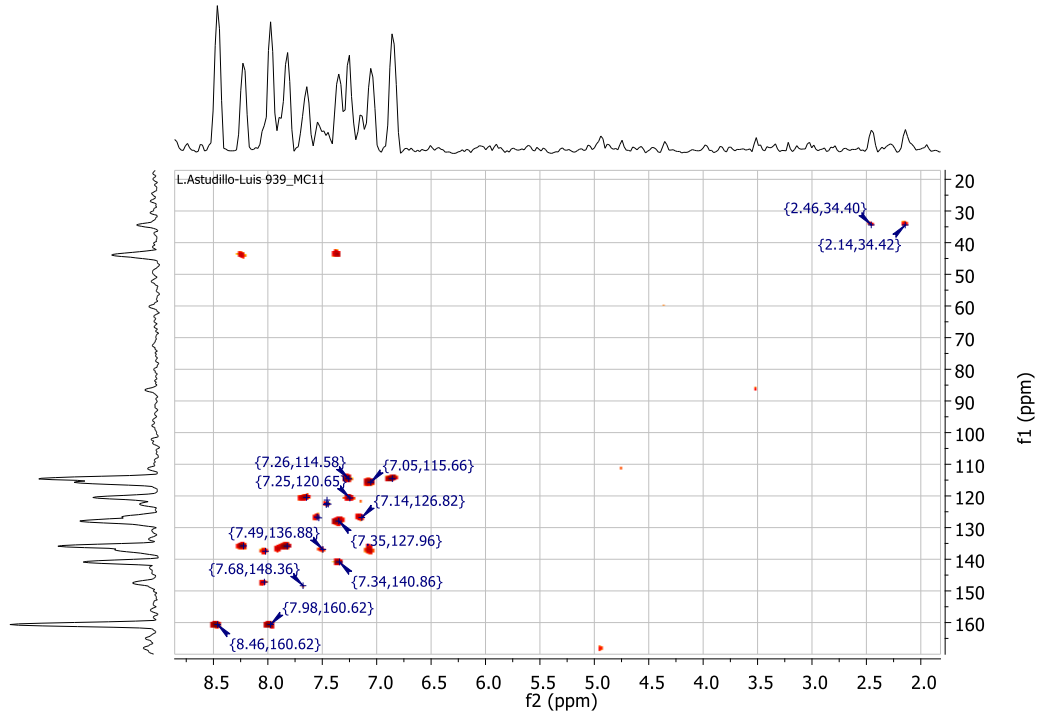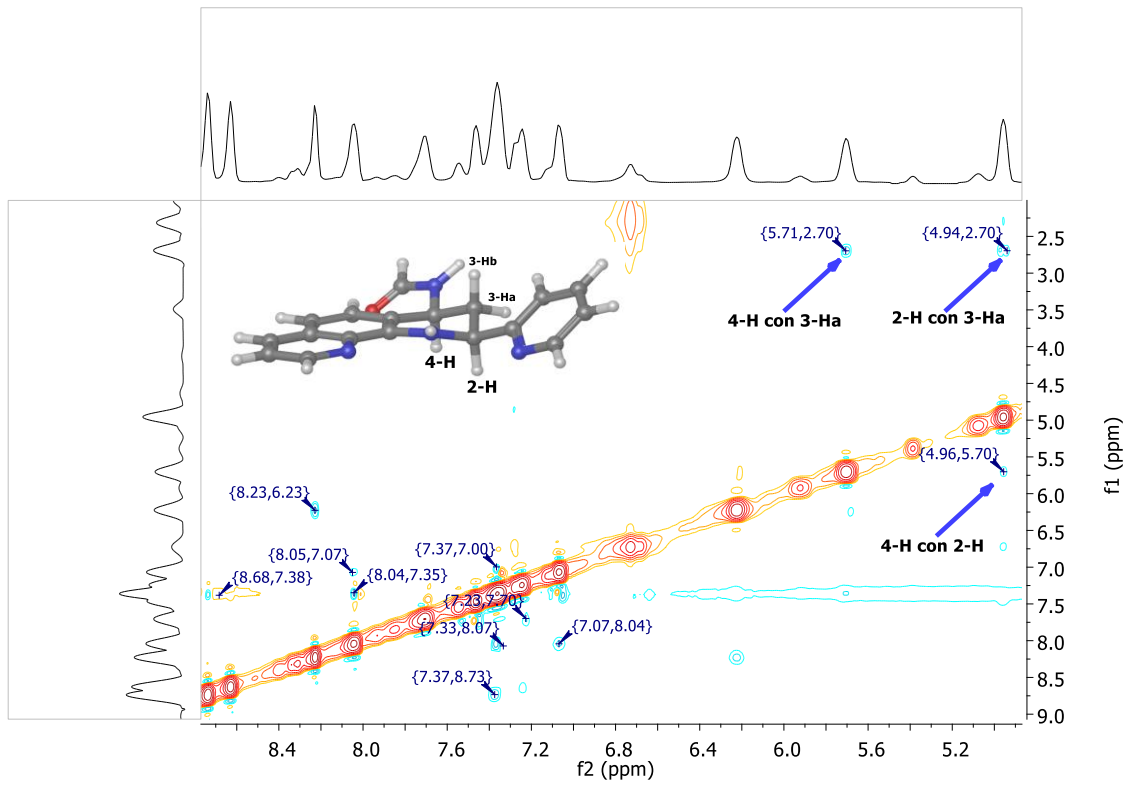

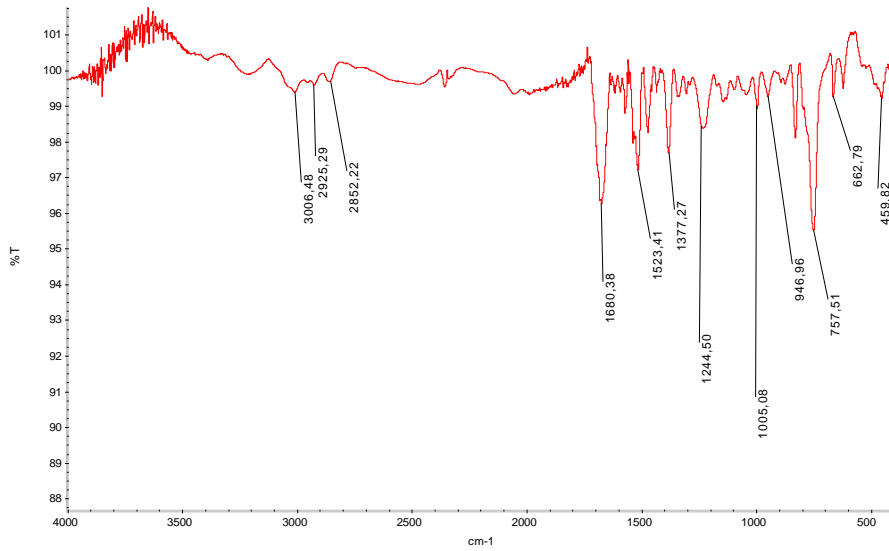

YORLEY MC-11 7 (1.269)

TOF MS ES+  
1.44e3

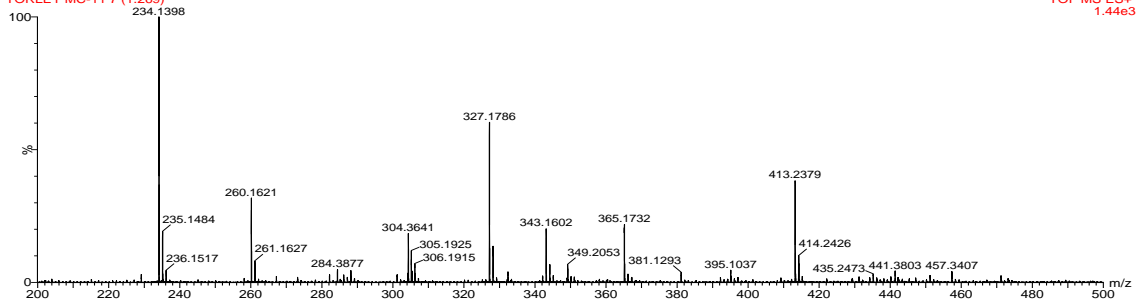

### Molecule 4c

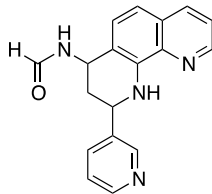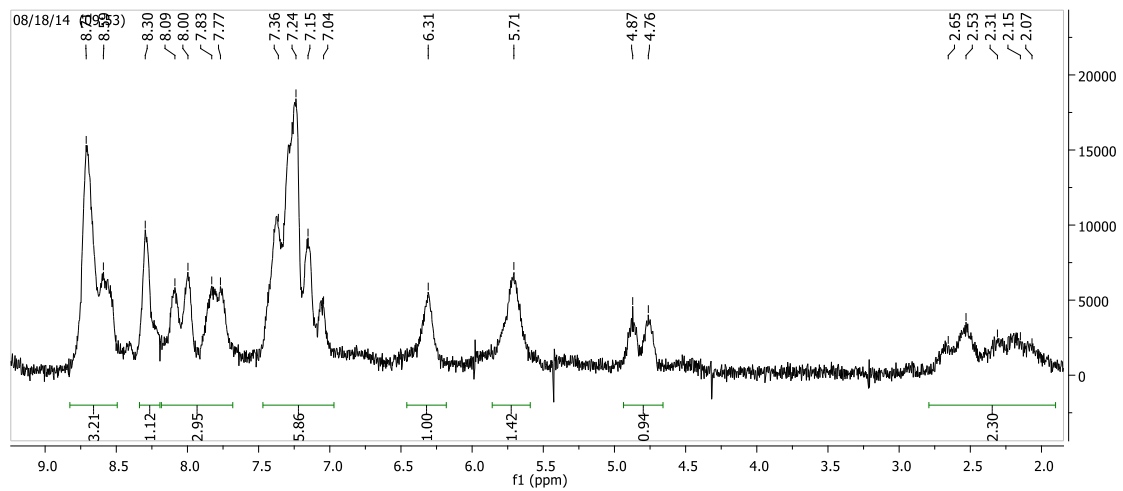

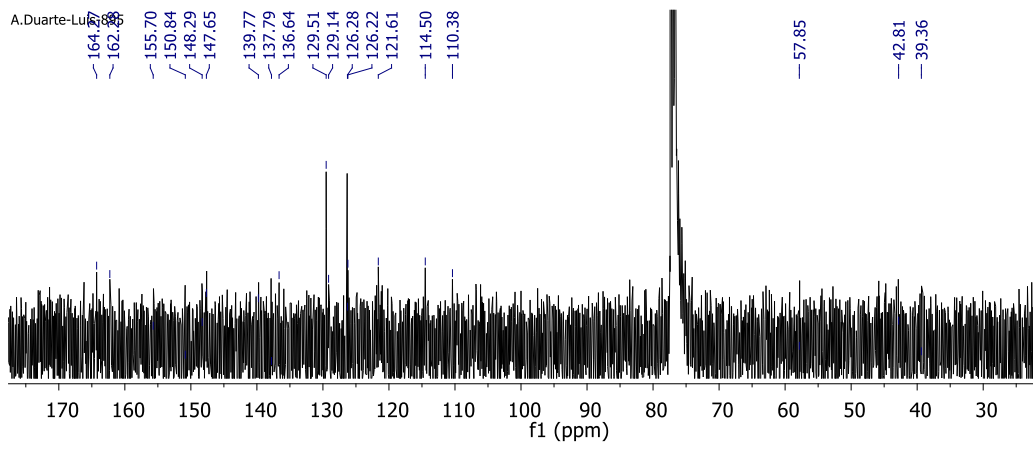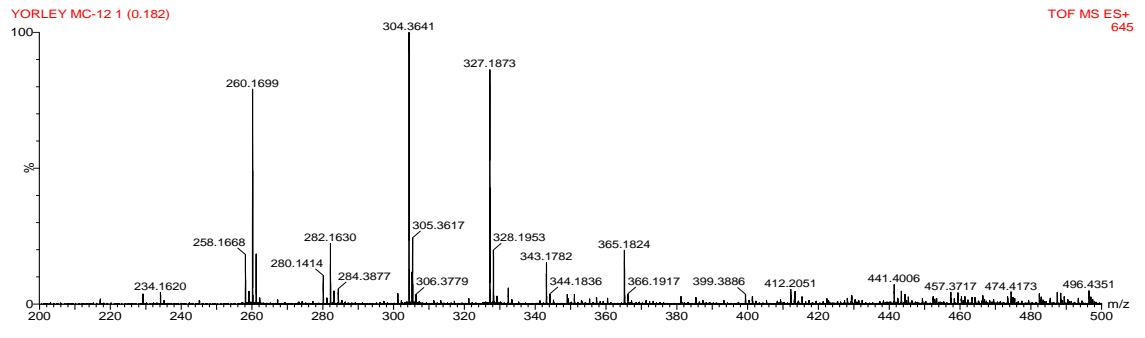

**Molecule 4d**

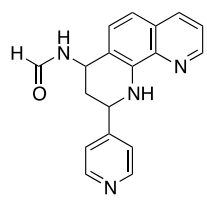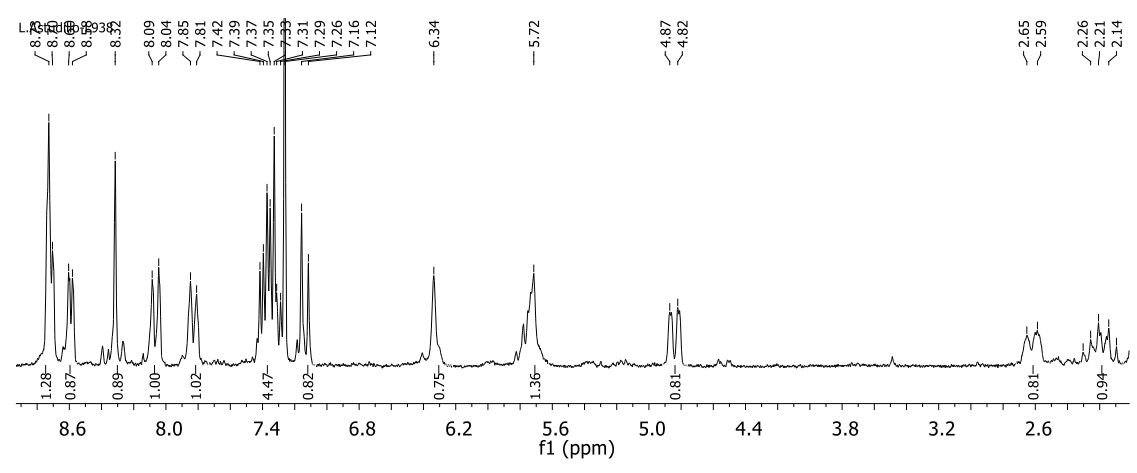

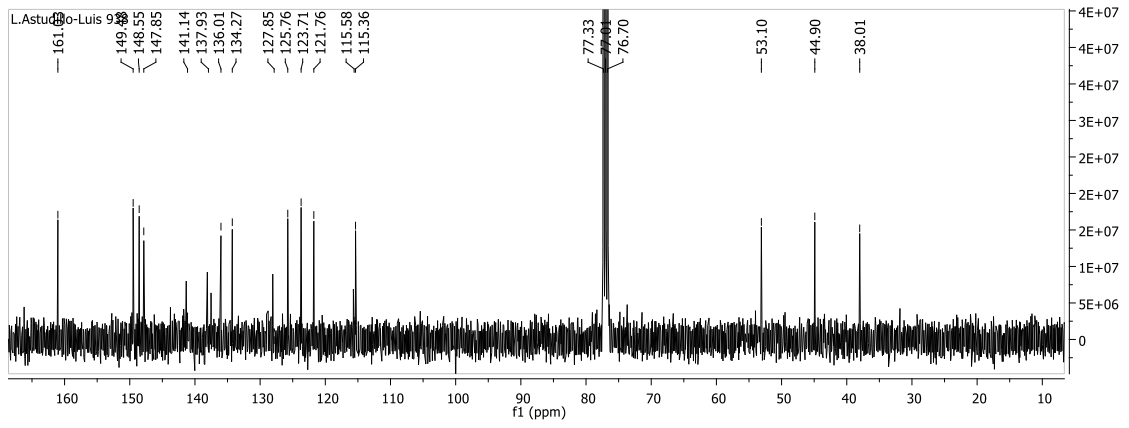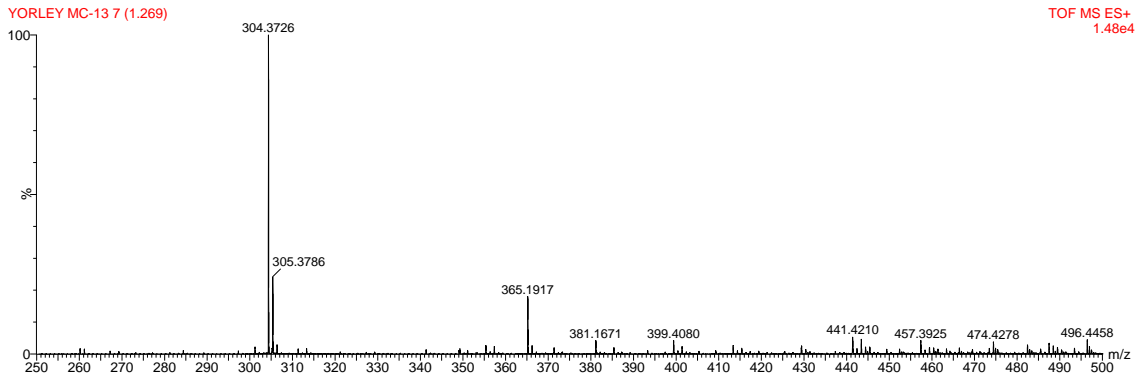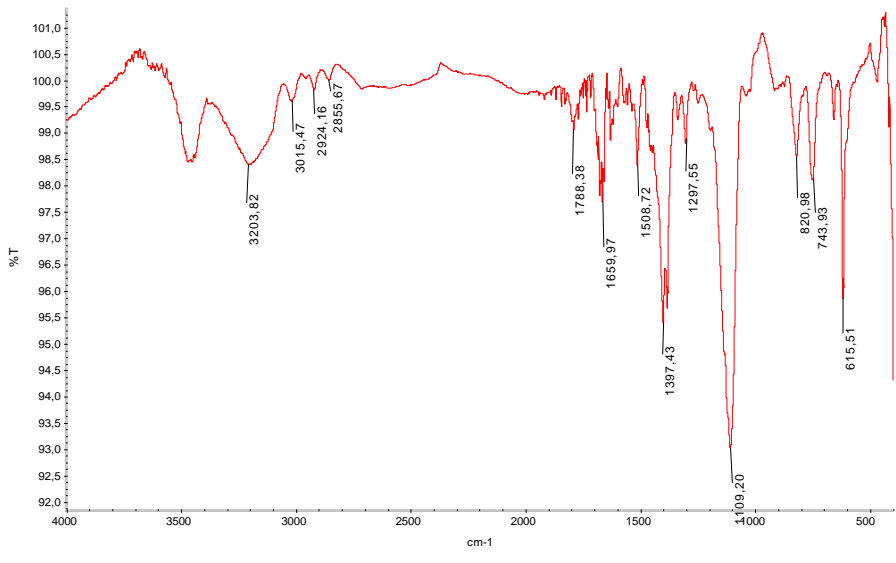

Molecule 4f



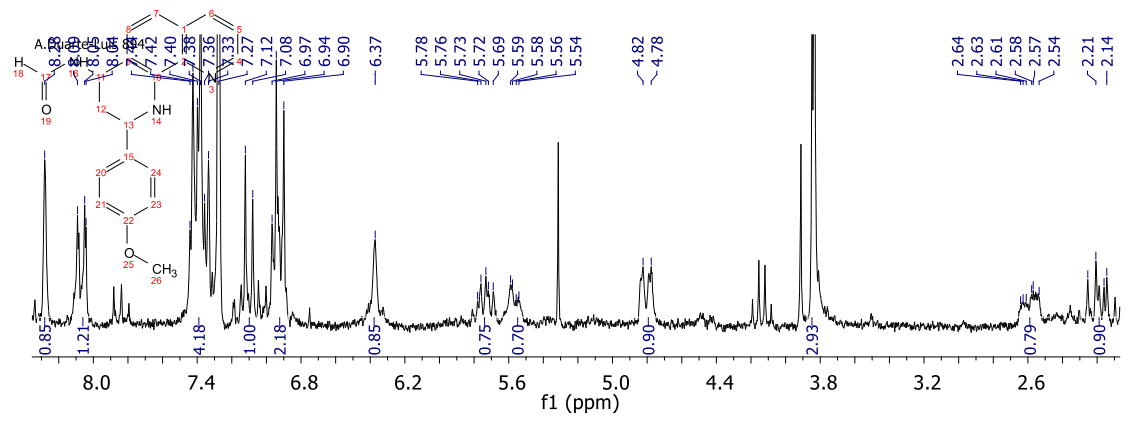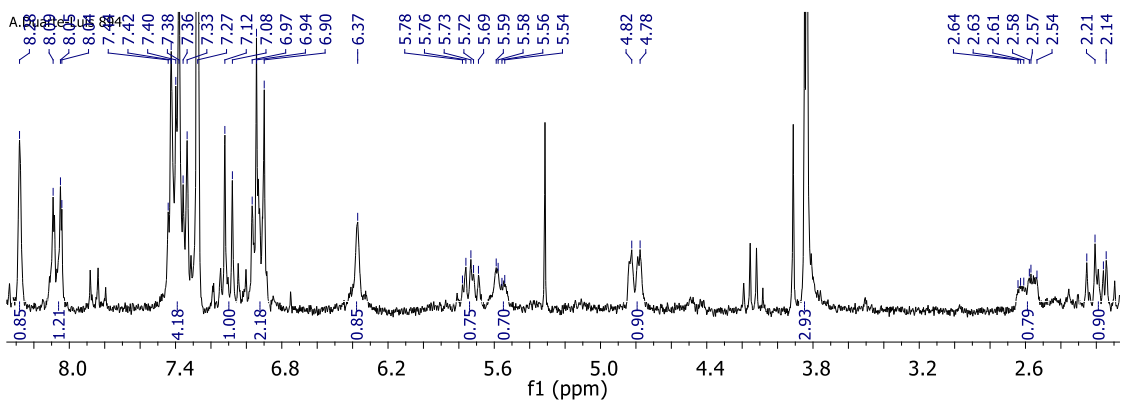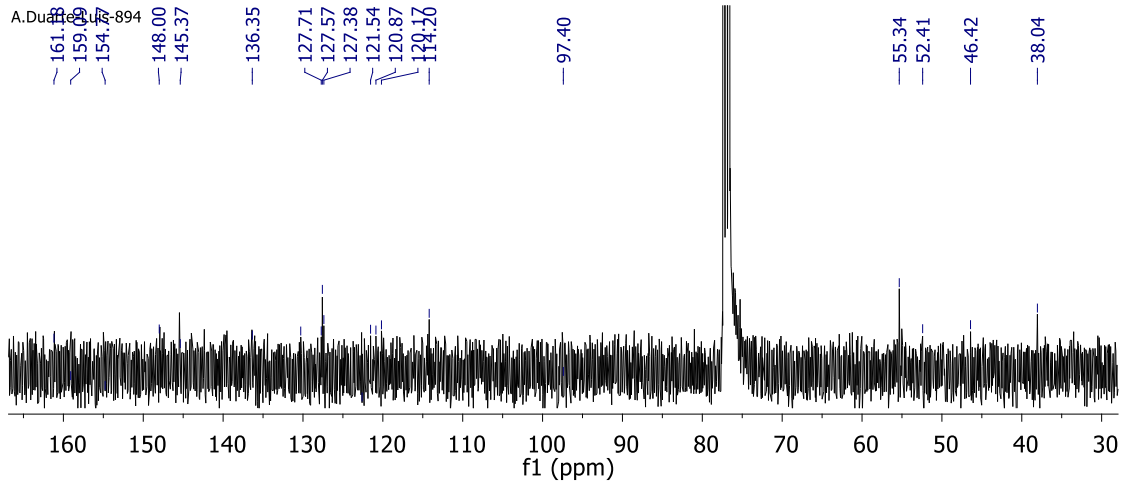

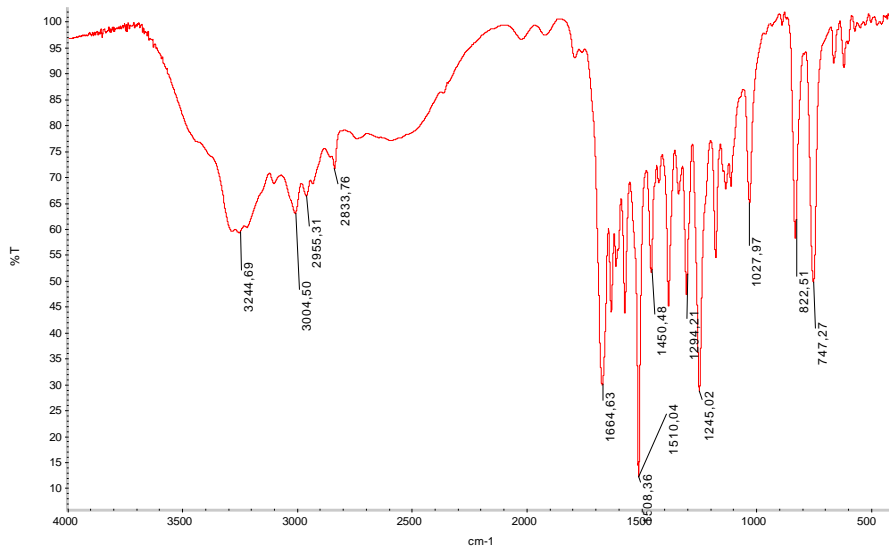

YORLEY MC-18A 9 (1.632)

TOF MS ES+  
382

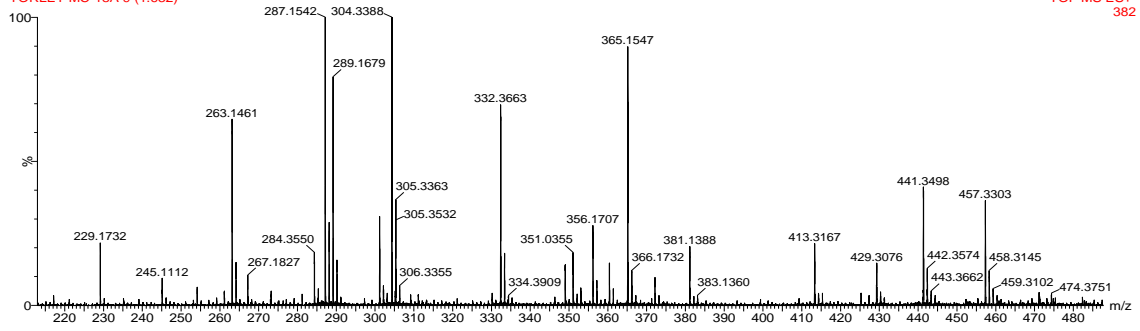

## Molecule 4g

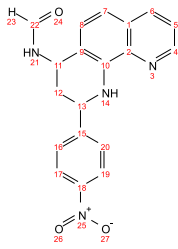

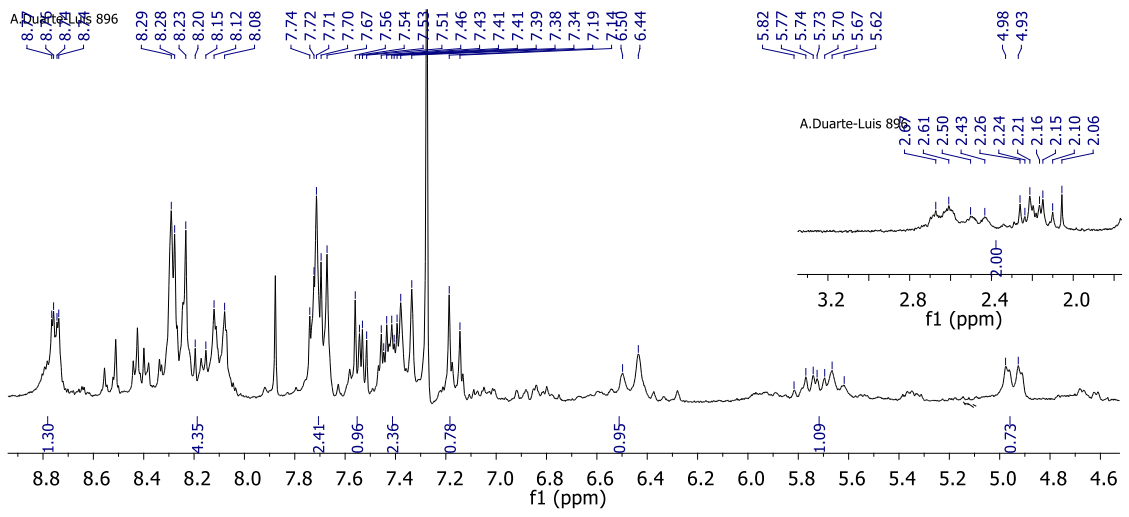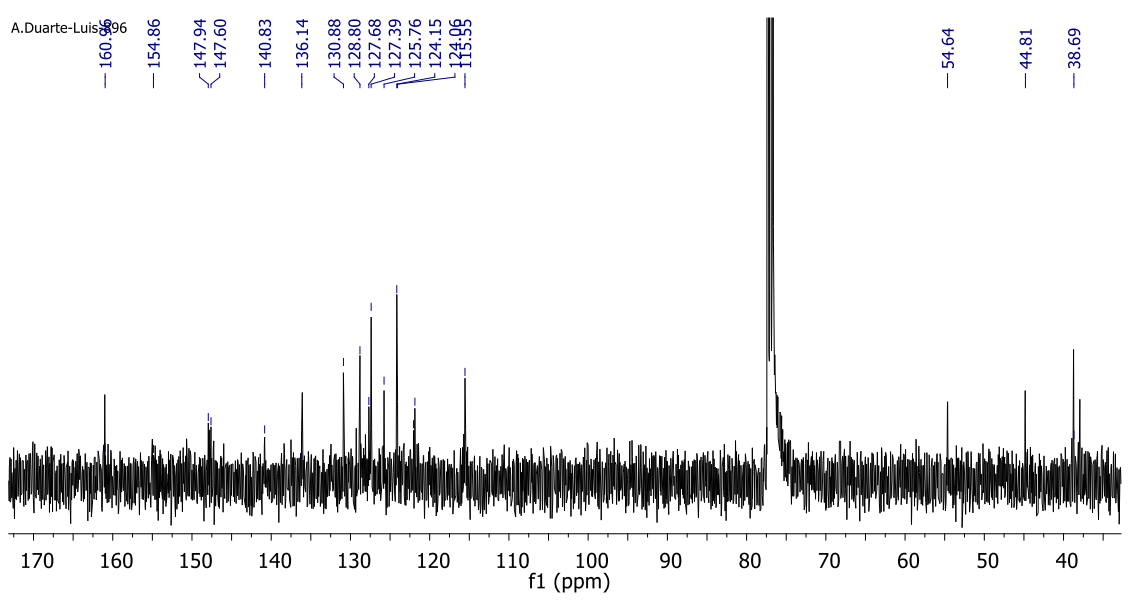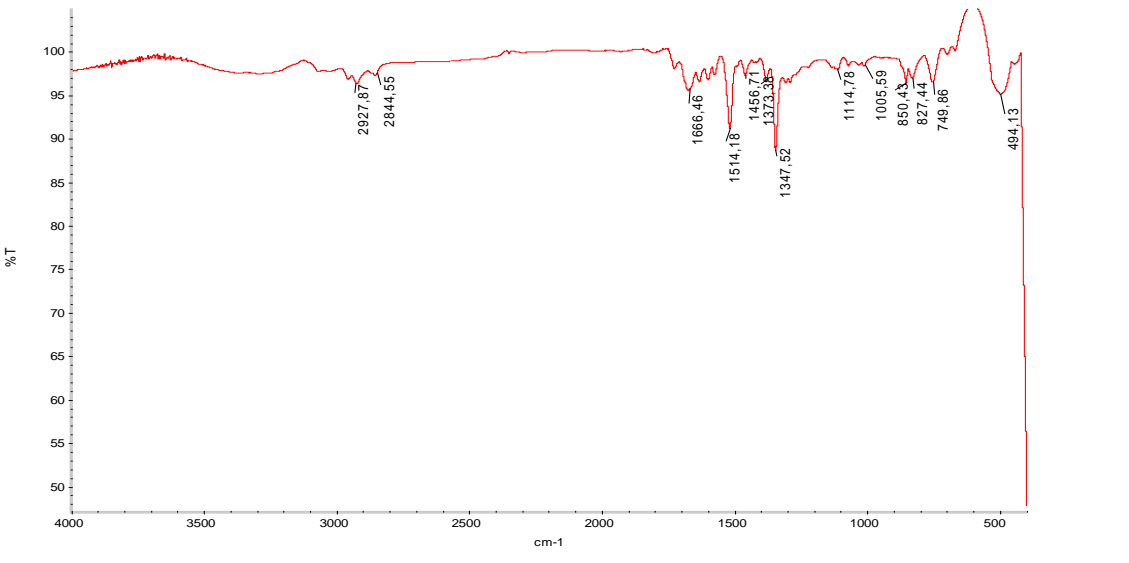



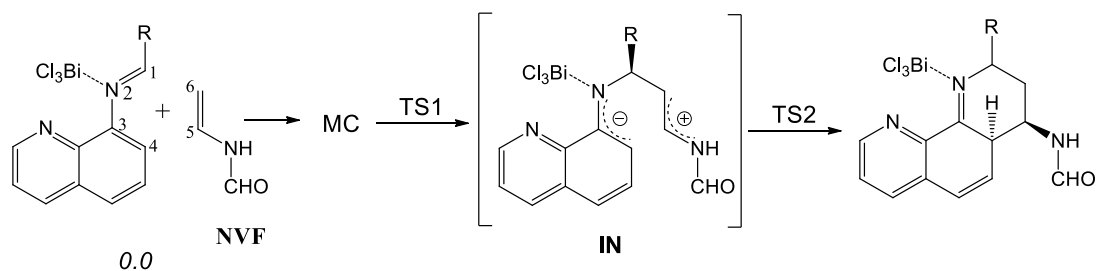

|                                                                                                   |      |      |      |      |     |      |      |      |
|---------------------------------------------------------------------------------------------------|------|------|------|------|-----|------|------|------|
| <b>1a</b> ; R = 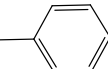 | MC1a | -9.3 | TS1a | 3.3  | INa | -5.2 | TS2a | -2.1 |
| <b>1b</b> ; R =  | MC1b | -9.7 | TS1b | -0.3 | INb | -7.7 | TS2b | -9.4 |
| <b>1c</b> ; R =  | MC1c | -8.7 | TS1c | 3.3  | INc | -5.5 | TS2c | -2.7 |

**Scheme 2:** iDA reaction between *N*-aryl imine and NVF using M06-2X/6-311G\*\* level of theory. The relative energies are in kcal mol<sup>-1</sup>.

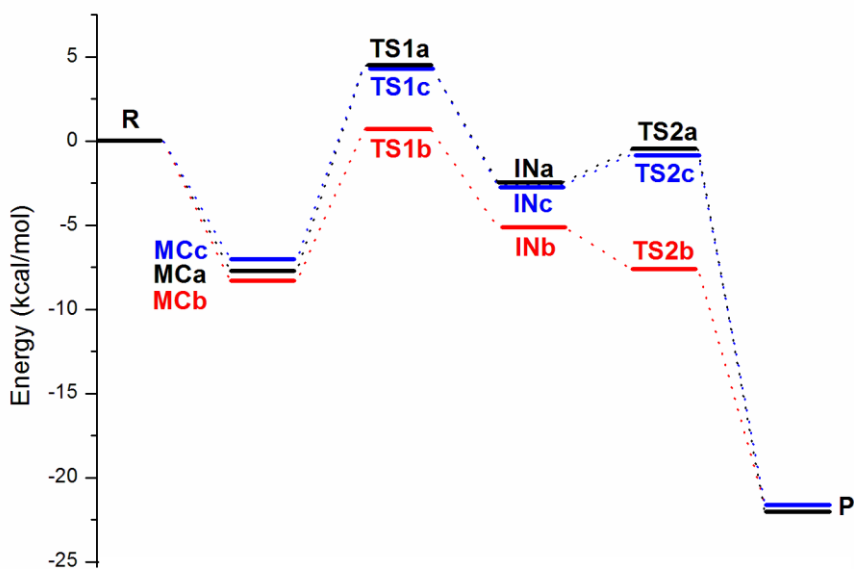

**Figure 1.** Relative Energy profile ( $\Delta E$  in kcal mol<sup>-1</sup>) of the iDA reaction between *N*-aryl imine and NVF.

**Reactivity index analysis:**

**Table 1.** *Reactivity index analysis:* M06-2X/6-311G\*\* level of theory. Electronic chemical potential  $\mu$ , hardnesses  $\eta$ , global electrophilicity  $\omega$ , and global nucleophilicity

N indices, for the reagents and compounds involved in iDA reactions for phenanthroline-THQ.

| Compounds | $\mu$   | $\eta$ | $\omega$ | $N$  | $\Delta\omega$ |
|-----------|---------|--------|----------|------|----------------|
| NVF       | -0.1545 | 0.3273 | 0.99     | 2.91 |                |
| <b>1a</b> | -0.1802 | 0.1988 | 2.22     | 2.71 | 1.23           |
| <b>1b</b> | -0.1848 | 0.1822 | 2.55     | 2.65 | 1.59           |
| <b>1c</b> | -0.1891 | 0.2251 | 2.16     | 2.62 | 1.17           |

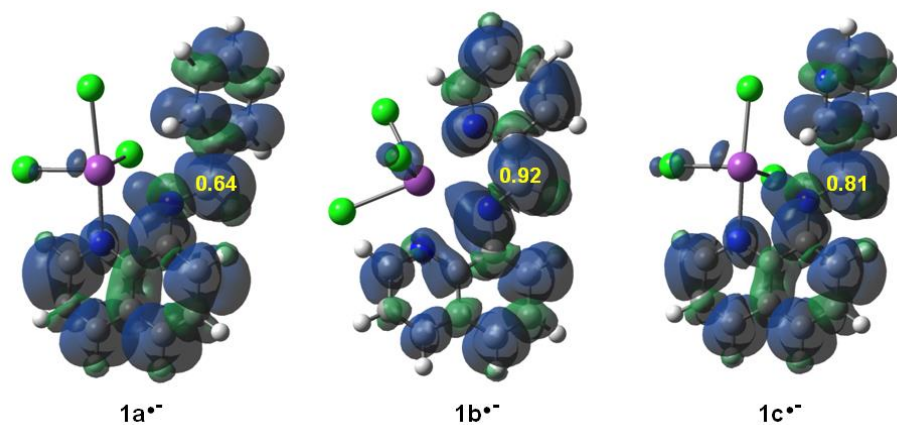

**Figure 2.** M06-2X/6-311G\*\* 3D Maps of the ASD (Atomic Spin Densities) and electrophilic P+k Parr functions of 1a, 1b and 1c compounds.

**Table 2.** Reactivity index analysis: M06-2X/6-311G\*\* level of theory. Electronic chemical potential  $\mu$ , hardnesses  $\eta$ , global electrophilicity  $\omega$ , and global nucleophilicity  $N$  indices, for the intermediaries involved in iDA reactions for phenanthroline THQ.

| Compounds  | $\mu$   | $\eta$ | $\omega$ | $N$  |
|------------|---------|--------|----------|------|
| <b>INa</b> | -0.1797 | 0.1757 | 2.50     | 3.54 |
| <b>INb</b> | -0.1814 | 0.1773 | 2.52     | 3.47 |
| <b>INc</b> | -0.1808 | 0.1759 | 2.53     | 3.51 |

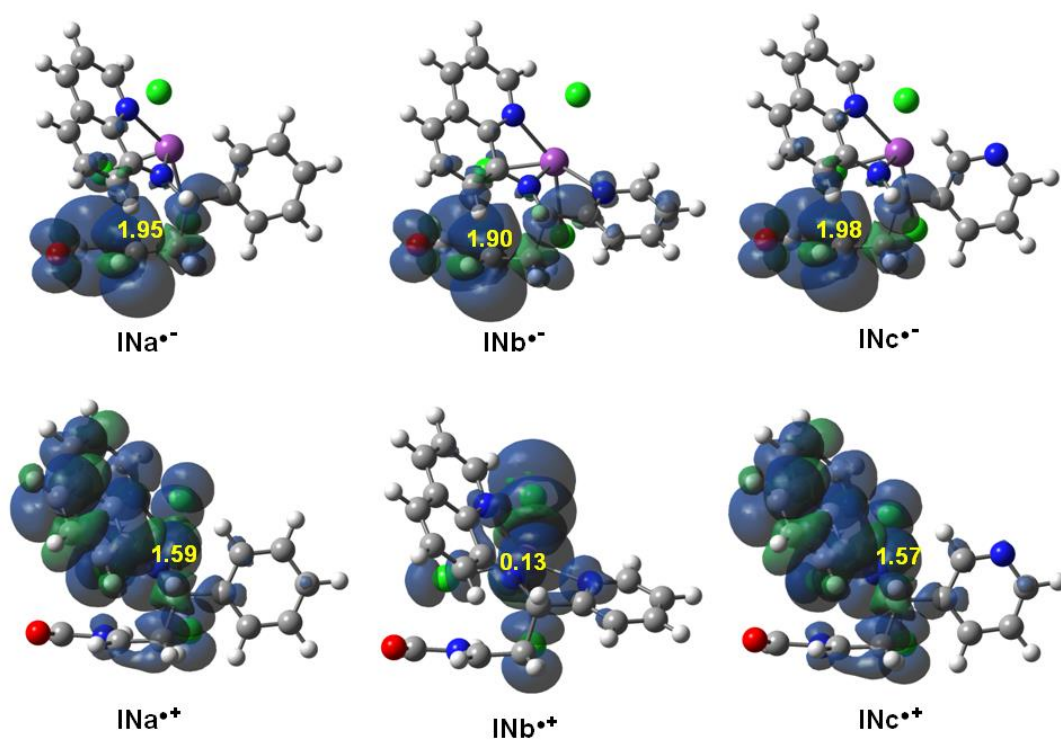

**Figure 3.** M06-2X/6-311G\*\* 3D Maps of the ASD (Atomic Spin Densities) and electrophilic P+k Parr functions of intermediaries 1a, 1b and 1c involved in iDA reaction.

This result suggests that the polarity of the process depends mostly on a high electrophilicity value at any of both fragments, thereby suggesting that during an electrophile–nucleophile interaction the effect of electrophilicity outweigh the effect of nucleophilicity.
